# Supplementary material
Source: publisher figshare collection journal article supplement (https://acs.figshare.com/ndownloader/files/4003561)
Supplement: Supplementary file 1 [file 4003561]

**Supporting Information for:**

**Exclusive Photothermal Heat Generation by a Gadolinium  
Bis(naphthalocyanine) Complex and Inclusion Into Modified High-Density  
Lipoprotein Nanocarriers for Therapeutic Applications**

*Simon Mathew,<sup>†,⊥</sup> Tatsuya Murakami,<sup>†,\*</sup> Hirotaka Nakatsuji,<sup>‡</sup> Haruki Okamoto,<sup>‡</sup>  
Nobuhiro Morone,<sup>†</sup> John E. Heuser,<sup>†</sup> Mitsuru Hashida,<sup>†,§</sup> and Hiroshi Imahori<sup>†,‡,\*</sup>*

<sup>†</sup> Institute for Integrated Cell-Material Sciences (WPI-iCeMS), Kyoto University,  
Sakyo-ku, Kyoto 606-8501, Japan

<sup>‡</sup> Department of Molecular Engineering, Graduate School of Engineering, Kyoto  
University, Nishikyo-ku, Kyoto 615-8510, Japan

<sup>§</sup> Department of Drug Delivery Research, Graduate School of Pharmaceutical  
Sciences, Kyoto University, Sakyo-ku, Kyoto 606-8501, Japan

<sup>⊥</sup> Present address: Lab for Photonics and Interfaces, Institute of Chemical Sciences  
and Engineering, École Polytechnique Fédérale de Lausanne, Lausanne 1015,  
Switzerland

Email: imahori@moleng.kyoto-u.ac.jp, murakami@icems.kyoto-u.ac.jp

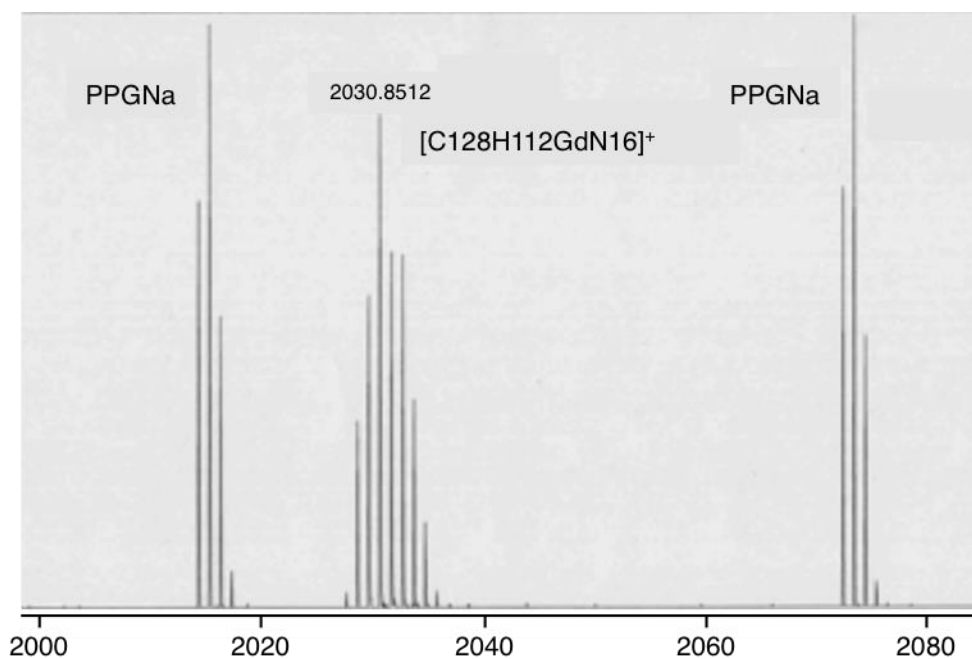

Figure S1. HRMS (ESI-MS) of **GdSand** ( $m/z$ ):  $[M]^+$  calcd. for  $C_{128}H_{112}GdN_{16}$  2030.8496; obs. 2030.8512. PPGNa is the polypropylene glycol-sodium salt used as a tuning reference.

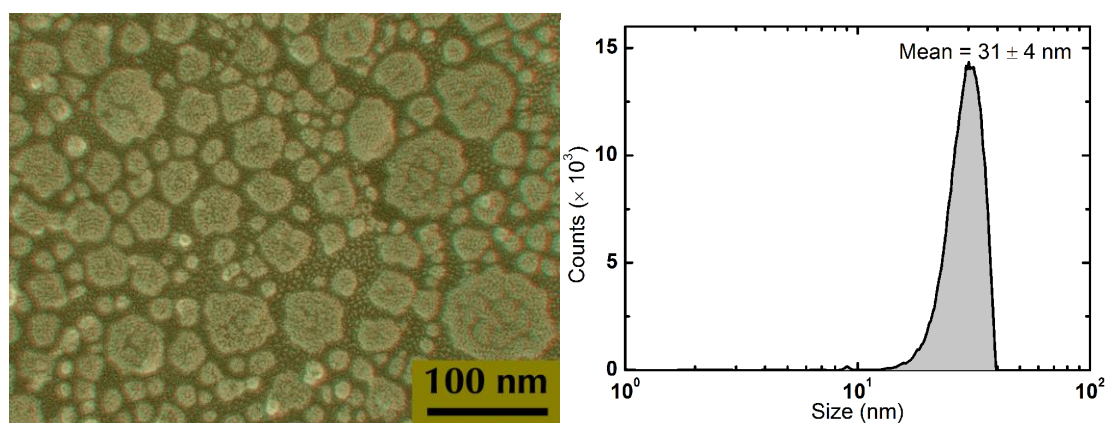

Figure S2. EM analysis of the **GdSand@cpHDL** (left) and histogram of **GdSand@cpHDL** size distribution (right).

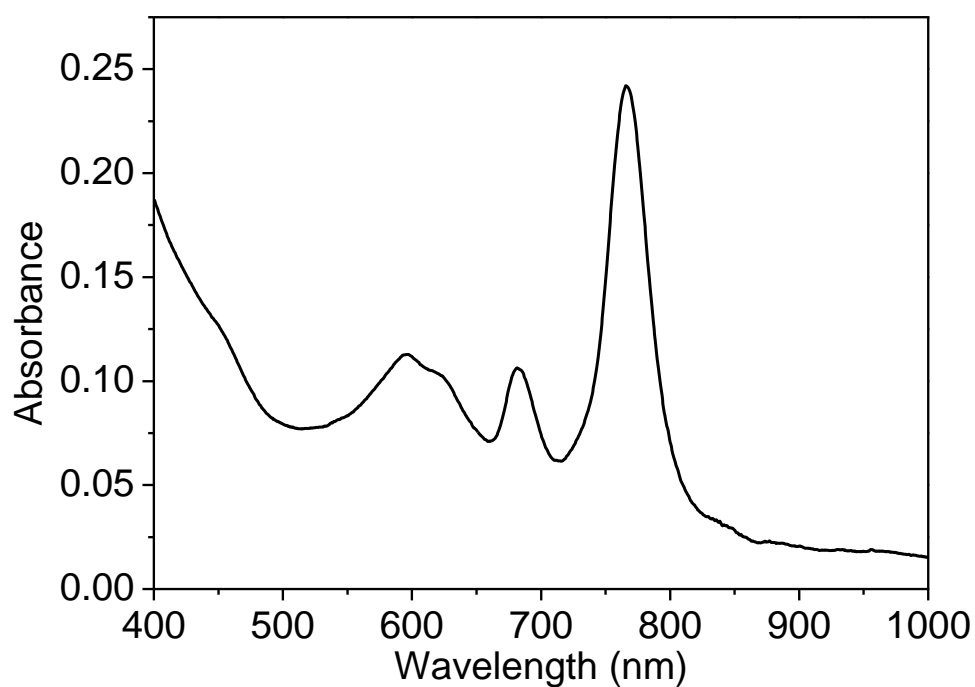

Figure S3. UV-Vis-NIR absorption spectrum of **GdSand@cpHDL** (made with the  $[GdSand] = 0.49$  mM stock solution) in saline.

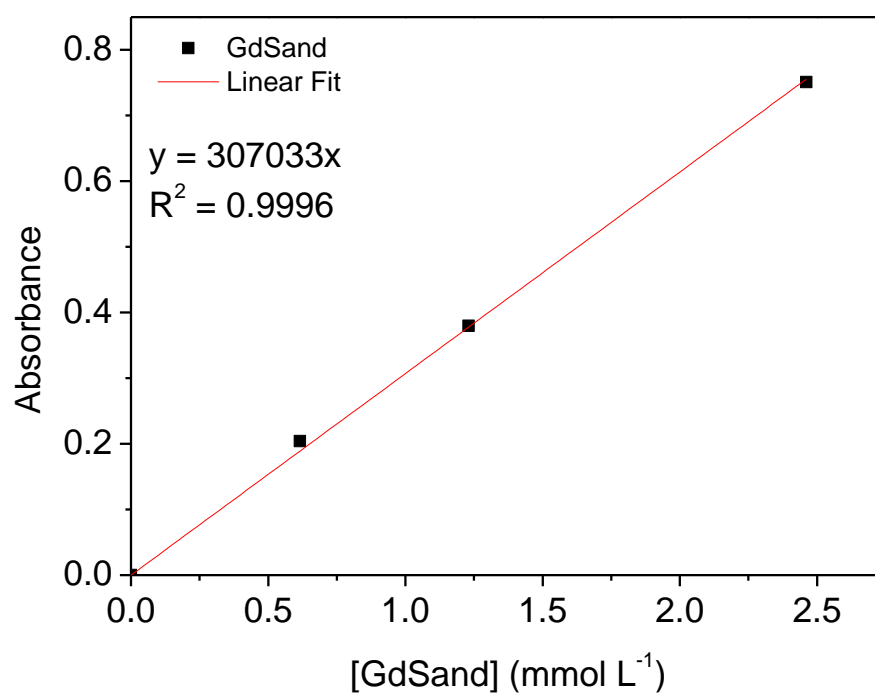

Figure S4. Calibration curve for **GdSand** in methyl oleate to determine uptake of **GdSand** by the **cpHDL** nanocarrier.

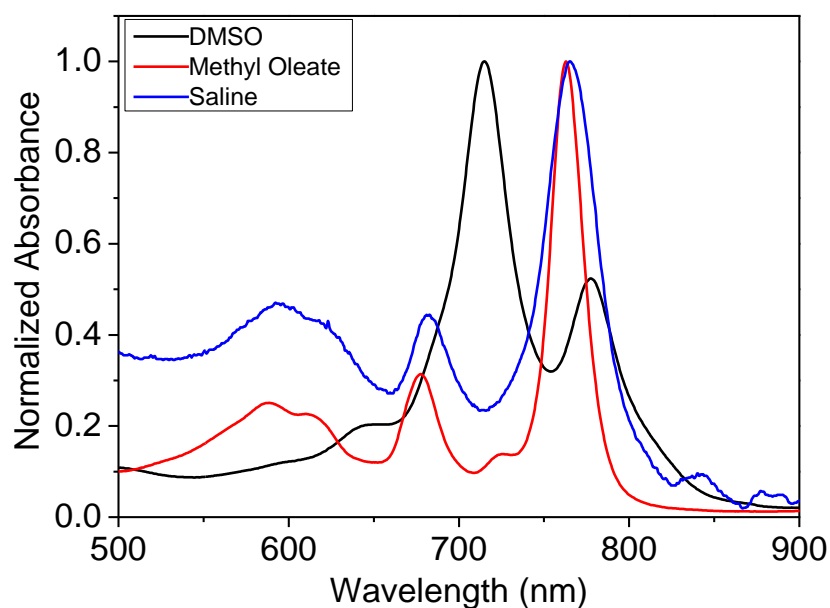

Figure S5. Comparison of normalized UV-Vis-NIR spectra of **GdSand** (0.25 mM) in DMSO (black) and methyl oleate (red) and **GdSand@cpHDL** in saline, formulated using 0.25 mM **GdSand** stock (blue). Note that spectra acquired in DMSO exhibit a significant shifting of the absorbance maximum to that of **GdSand** in methyl oleate and **GdSand@cpHDL** in saline.

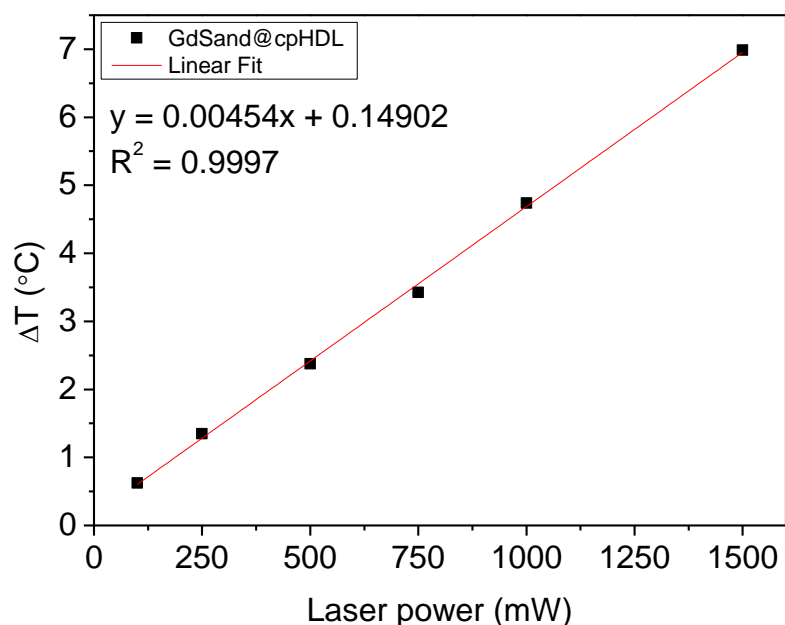

Figure S6. Photothermally induced temperature increase of **GdSand@cpHDL** (0.D = 0.1) at  $t = 10$  min of constant laser irradiation, plotted as a function of the incident laser light power.

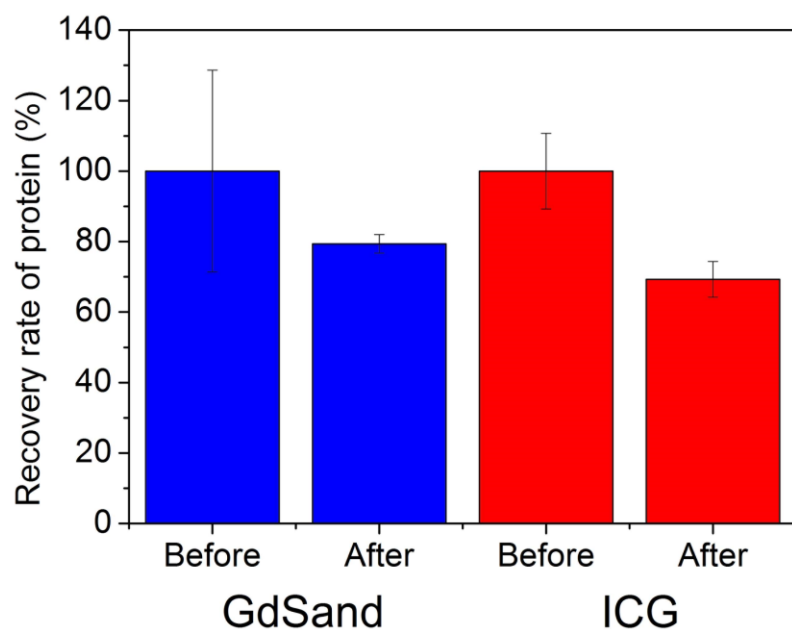

Figure S7. Densitometric analysis of the protein moiety of **cpHDL** from **GdSand@cpHDL** and **ICG@cpHDL** before and after irradiation ( $\lambda_{ex} = 770$  nm, 1500 mW, 20 min).

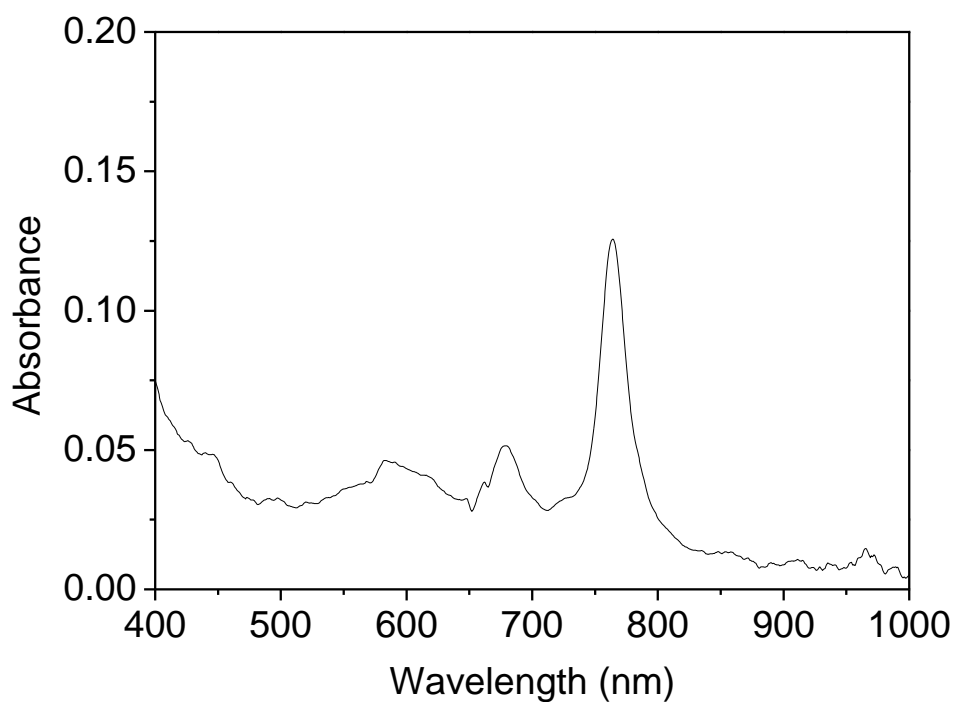

Figure S8. Absorption spectrum of the cell extract in methyl oleate, confirming the presence of **GdSand**.
